# Supplementary material for: Patient access to chronic medications during the Covid-19 pandemic: Evidence from a comprehensive dataset of US insurance claims
Source: PubMed Central journal article supplement (PMC8016279; doi:10.1371/journal.pone.0249453), 2021-04-01
Supplement: pone.0249453.s007.pdf [file pone.0249453.s007.pdf]

## S2 Table. Summary Statistics

| <b>S2 Table: Summary Statistics for Symphony Claims Database: May 2019 through Aug 2020</b> |                                                              |                                               |                                                                         |  |
|---------------------------------------------------------------------------------------------|--------------------------------------------------------------|-----------------------------------------------|-------------------------------------------------------------------------|--|
| <u><b>Class Drug</b></u>                                                                    | <u><b>Addiction</b></u><br>Buprenorphine/Naloxone            | <u><b>Immunosuppression</b></u><br>Tacrolimus | <u><b>Hormonal Contraceptive</b></u><br>Norgestrel-Ethinyl<br>Estradiol |  |
| Total Claims                                                                                | 31,507,516                                                   | 7,370,365                                     | 3,992,924                                                               |  |
| Rejected - Any Reason                                                                       | 7,359,995                                                    | 1,778,717                                     | 2,796,919                                                               |  |
| Filled Claims                                                                               | 24,147,521                                                   | 5,591,648                                     | 8,658,587                                                               |  |
| N Patients                                                                                  | 1,103,507                                                    | 280,194                                       | 8,195,895                                                               |  |
| Mean Age (SD)                                                                               | 40.1<br>(11.7)                                               | 52.9<br>(17)                                  | 40.1<br>(11.7)                                                          |  |
| Pct Female                                                                                  | 43.1%                                                        | 43.0%                                         | 99.5%                                                                   |  |
|                                                                                             |                                                              |                                               |                                                                         |  |
| <u><b>Class Drug</b></u>                                                                    | <u><b>ADHD (Stimulant)</b></u><br>Dexamethylphenidate<br>HCL | <u><b>SSRI</b></u><br>Escitalopram<br>Oxalate | <u><b>Antipsychotic</b></u><br>Haloperidol                              |  |
| Total Claims                                                                                | 11,455,506                                                   | 81,481,678                                    | 2,827,624                                                               |  |
| Rejected - Any Reason                                                                       | 2,796,919                                                    | 12,330,257                                    | 580,410                                                                 |  |
| Filled Claims                                                                               | 8,658,587                                                    | 69,151,421                                    | 2,247,214                                                               |  |
| N Patients                                                                                  | 760,743                                                      | 8,195,895                                     | 266,081                                                                 |  |
| Mean Age (SD)                                                                               | 14.9<br>(10.8)                                               | 45.3<br>(19)                                  | 51.9<br>(19.6)                                                          |  |
| Pct Female                                                                                  | 33.9%                                                        | 69.6%                                         | 48.1%                                                                   |  |

S2 Table Notes: Summary statistics across all patients in the Symphony Prescriptions Claims database with at least one claim for the listed drug. The analysis includes all branded and generic formulations of the drug in question in all strengths.
